# Supplementary material for: Knowledge and motivations of training in peer review: an international cross-sectional survey
Source: bioRxiv or medRxiv preprint supplement (doi:10.1101/2022.09.03.22279564), 2022-09-04
Supplement: Supplementary file [file media-4.pdf]

Corresponding author emails extracted from recent articles published in biomedical journals; emailed survey invitation (n = 2,000)

↓  
Emails sent/received as of June 6, 2022 (n = 1,861)

↓  
Survey responses as of June 13, 2022 (n = 186)

↓

Emails unable to be sent, with reason (n = 107):

- “550 delivery not authorized, message refused” (n = 6)
- “550 5.4.1 Recipient address rejected: Access denied” (n = 7)
- “Connection is not secured by TLS” (n = 1)
- “Unable to look up host [x]: Name or service not known” (n = 7)
- “550 Ip frequency limited” (n = 11)
- “The email that you tried to reach is disabled” (n = 1)
- “Mailbox full – quota exceeded” (n = 4)
- “550 5.1.0 Address rejected” (n = 7)
- “Requested mail action aborted, mailbox not found” (n = 2)
- “Service unavailable; Client host [137.122.8.106] blocked using blackholes.easynet.nl” (n = 1)
- “553 5.7.1 Sender ERROR” (n = 1)
- “Requested actions not taken as the mailbox is unavailable” (n = 2)
- “554 Security violation” (n = 1)
- “Temporary unavailable user” (n = 1)
- “Message cannot be accepted, spam rejection” (n = 1)
- “The email address you entered couldn’t be found” (n = 6)
- “Recipient address rejected: User unknown” (n = 4)
- “554 5.7.1. Recipient address rejected: Invalid-Recipient” (n = 1)
- “The email account that you tried to reach does not exist” (n = 3)
- “550 5.1.1 Error: invalid recipients is found” (n = 1)
- “511 no mailbox here by that name” (n = 1)
- “550 5.0.0 Unrouteable address” (n = 1)
- “451 4.1.0 Recipient disabled” (n = 1)
- “Connection refused” (n = 2)
- Email address provided doesn’t allow for email to be sent (n = 3)
- “Connection timed out” (n = 3)
- Mail rejected from recipient (n = 3)
- “Part of [recipient’s] network is on our block list (S3140)” (n = 22)
- “Recipient’s mailbox is undergoing maintenance” (n = 1)
- “The email admin for the organization [x] created an email rule restriction” (n = 1)
- “550
- 5.7.107 Recipient not on bypass list, your IP has been found on a block list” (n = 1)
- “550 Envelope blocked” (n = 1)

↓

Unable to reach/participate, with reason (n = 32):

- Unable to participate in study (replied) (n = 19)
- Out of office for duration of study (n = 9)
- No longer working in their department/institution, no new email provided (n = 4)
